# Supplementary material for: Study protocol of a population-based cohort investigating Physical Activity, Sedentarism, lifestyles and Obesity in Spanish youth: the PASOS study
Source: PubMed Central journal article supplement — BMJ Open. 2020 Sep 23;10(9):e036210. doi: 10.1136/bmjopen-2019-036210 (PMC7513598; doi:10.1136/bmjopen-2019-036210), 2020-09-23
Supplement: bmjopen-2019-036210supp001.pdf [file bmjopen-2019-036210supp001.pdf]

## PASOS INVESTIGATORS

Steering Committee – SF. Gómez, H. Schröder

Programs, Gasol Foundation, Sant Boi de Llobregat, Spain: SF. Gómez, C. Homs, P. Berruezo, G. Según, M. Bellver, S. Torres, M. Picas, E. Lopez-Puertas, J. Antoni-Fernández, A. Cosolo, S. Scarrone, A. Marin, V. Marzini, G. Zonta, S. Bernal.

Cardiovascular Risk and Nutrition Research Group, IMIM (Hospital del Mar Medical Research Institut), Barcelona, Spain: H. Schröder, M. Fitó, C. Lassale, I. Subirana, J. Vila, M. Grau.

Faculty of Health Sciences, University of Málaga-Institute of Biomedical Research of Malaga (IBIMA), Málaga, Spain: J. Wärnberg, J.C. Benavente-Marín, J. Pérez-López, E. Crespo-Oliva, P. Romero-Cazorla, N. Moreno-Morales, F.J. Barón-López, J.C. Fernández-García, N. Pérez-Farinós.

ELIKOS group, Institute for Innovation & Sustainable Development in Food Chain (IsFood), Public University of Navarra, Navarra, Spain: I. Labayen, M. Medrano, M. Oses, L. Arenaza.

ImFINE Research Group. Department of Health and Human Performance. Universidad Politécnica de Madrid, Madrid, Spain: M. González-Gross, A.G. Zapico, E. Gesteiro, A.G. Carro, R. Torres-Peralta.

Physical Activity and Quality of Life Research Group (AFYCAV), Faculty of Sport Sciences, University of Extremadura, Caceres, Spain: N. Gusi, J. Sánchez-Gómez.

PAFS Research Group, Faculty of Sports Sciences, University of Castilla-La Mancha, Toledo, Spain: S. Aznar, F. Jiménez-Zazo, E. Cabanillas, C. Romero-Blanco, A. Dorado.

Research Center for High Performance Sport, Catholic University of Murcia, Murcia, Spain: PE. Alcaraz, E. Marín-Cascales.

Faculty of Sports Sciences and Physical Education, Universidade da Coruña, A Coruña, Spain: M.A. González-Valeiro, M. Sevilla-Sanchez.

Research Institute of Biomedical and Health Sciences (IUIBS), University of Las Palmas de Gran Canaria, Las Palmas, Spain: L. Serra-Majem, E. Herrera-Ramos.

Regional Unit of Sports Medicine-Municipal Sports Foundation of Avilés, Asturias, Spain: N. Terrados, S. Pulgar.

Research Group of Community Nutrition & Oxidative Stress, University of the Balearic Islands, Palma de Mallorca, Spain: JA. Tur, MM. Bibiloni, L. Gallardo-Alfaro.

Probitas Foundation, Barcelona, Spain: M. Segú, O. Sancho, C. Sistac.
